# Supplementary material for: Scanning or desorption isotherms? Characterising sorption hysteresis of wood
Source: Springer Nature journal article supplement (doi:10.1007/s10570-018-1898-9), 2018-06-13
Supplement: MOESM1 [file 15844180]

## Supplementary Information to:

# Scanning or desorption isotherms? Characterising sorption hysteresis of wood

*Maria Fredriksson and Emil Englund Thybring*

Sorption isotherms for all tissue types included in “Experiment 1” are shown in Figure S1 and Figure S2 shows the sorption hysteresis evaluated from these. All sorption isotherm data from “Experiment 2” and the evaluated hysteresis are shown in Figures S3 and S4 respectively.

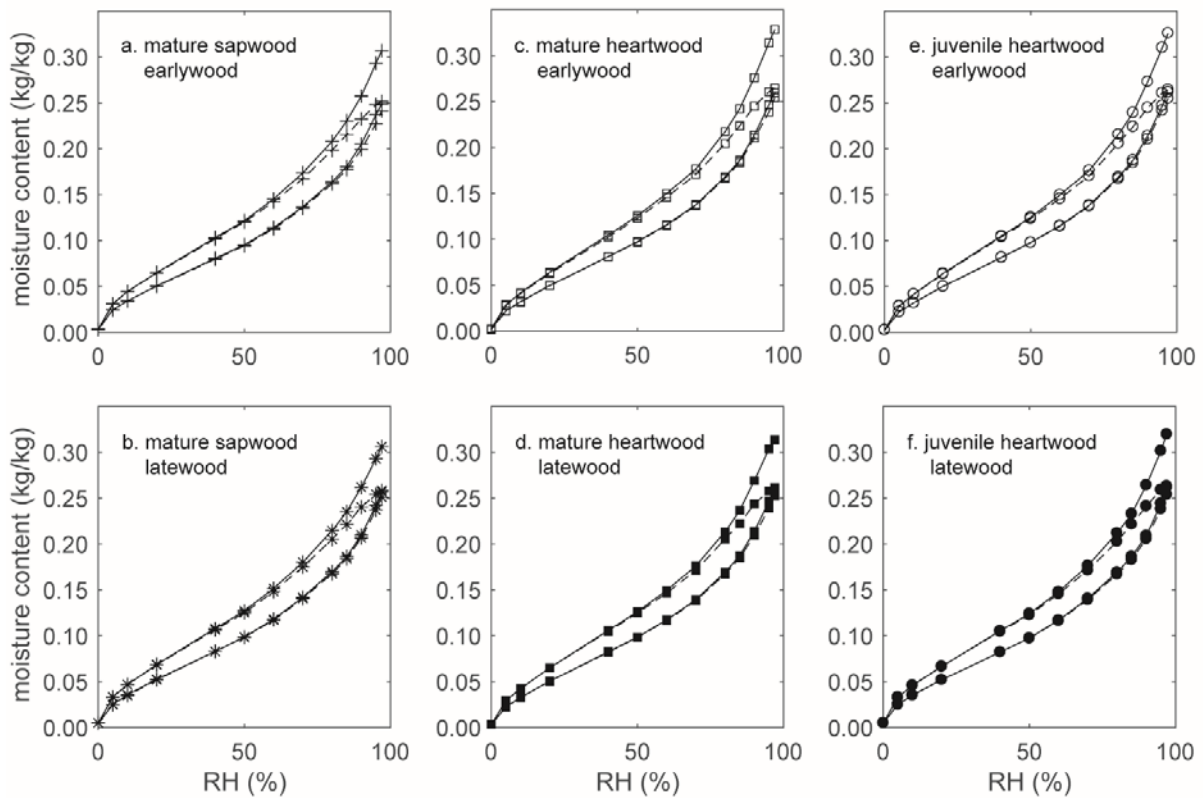

Figure S1. Sorption isotherms for all tissue types in “Experiment 1” where desorption was initiated from water saturated state (-) and from 97% RH (--).

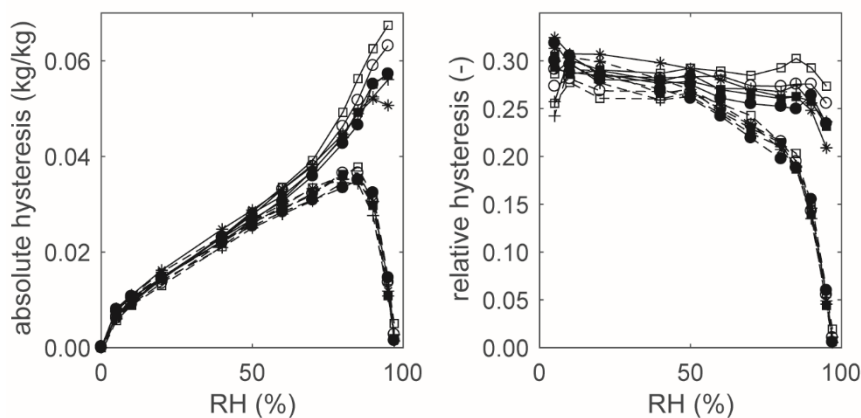

Figure S2. Absolute and relative sorption hysteresis evaluated from the sorption isotherms in Figure S1.

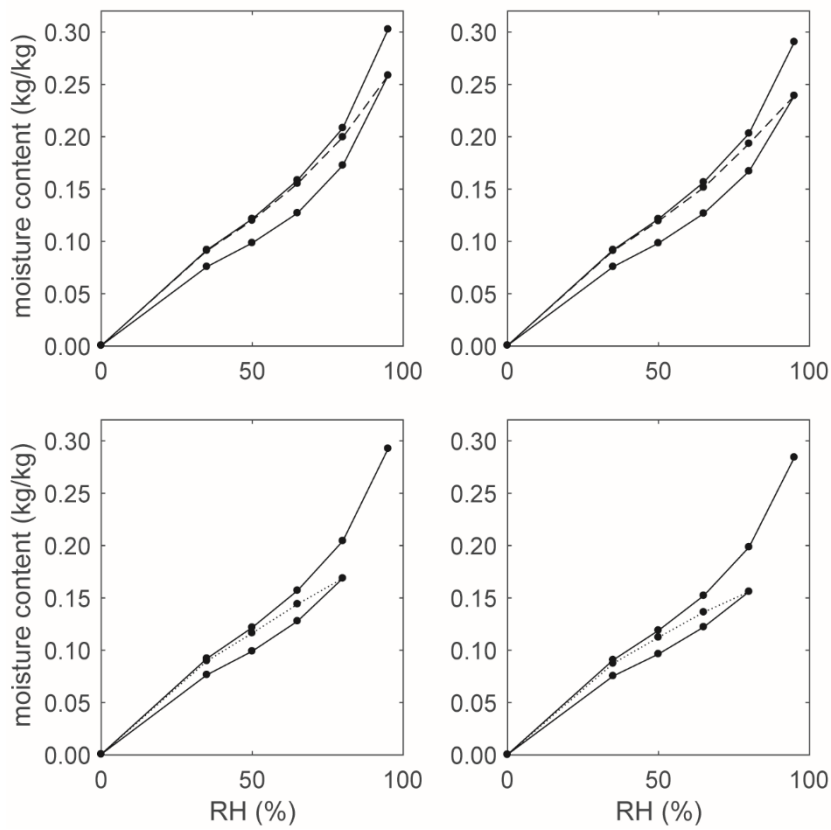

Figure S3. All sorption isotherms determined in “Experiment 2”. Average data is shown in Figure 2b in the paper.

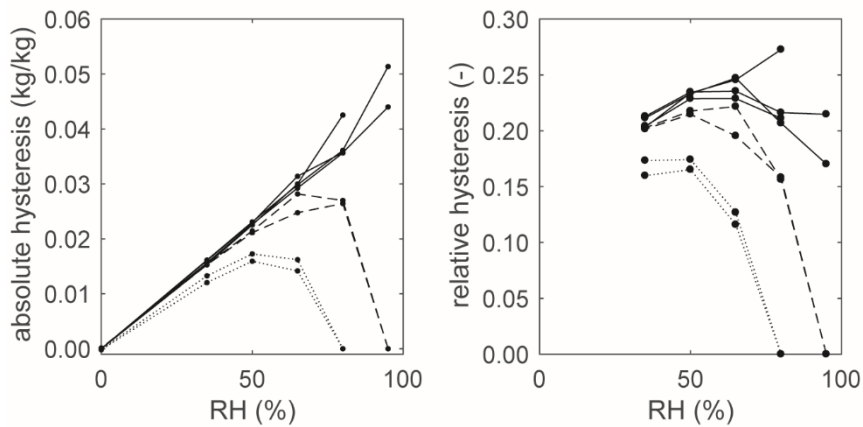

Figure S4. Absolute and relative hysteresis evaluated from the sorption isotherms in Figure S3. Average data is shown in Figure 2d,f in the paper. Hysteresis was evaluated between absorption and desorption isotherms (-), absorption and scanning isotherms from 95 % RH (- -) and absorption and scanning isotherms from 80 % RH (· ·).
